# Supplementary material for: DHA and vitamin E antagonized the Aβ25–35-mediated neuron oxidative damage through activation of Nrf2 signaling pathways and regulation of CD36, SRB1 and FABP5 expression in PC12 cells
Source: Royal Society of Chemistry journal article supplement (doi:10.1039/c8fo01713a), 2019-01-01
Supplement: c8fo01713a1.pdf [file c8fo01713a1.pdf]

### Supporting information

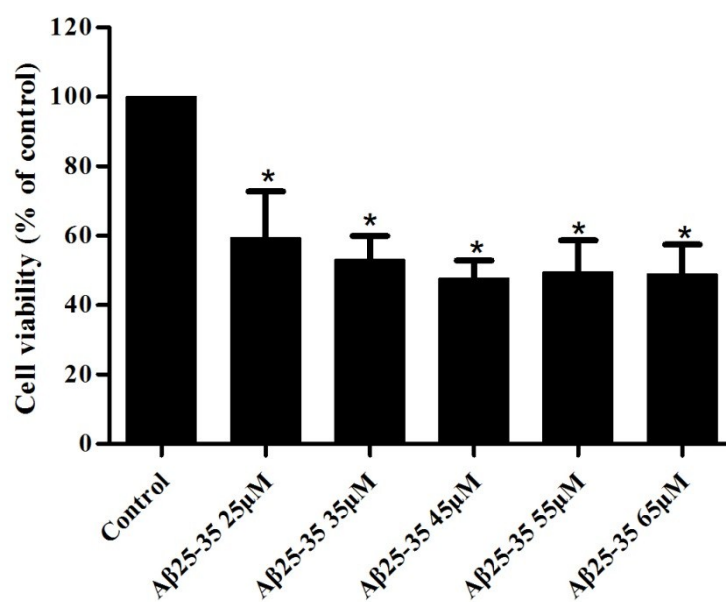

**Figure 1 Viability of PC12 cells treated with A $\beta$ <sub>25-35</sub>, (*n* = 6 for each group).** The cells were treated with A $\beta$ <sub>25-35</sub> at the dosage of 25  $\mu$ M, 35  $\mu$ M, 45  $\mu$ M, 55  $\mu$ M, 65  $\mu$ M for 48 h, after that, MTT assay used for measuring cell viability. \*Comparing with control group, *P* < 0.05.

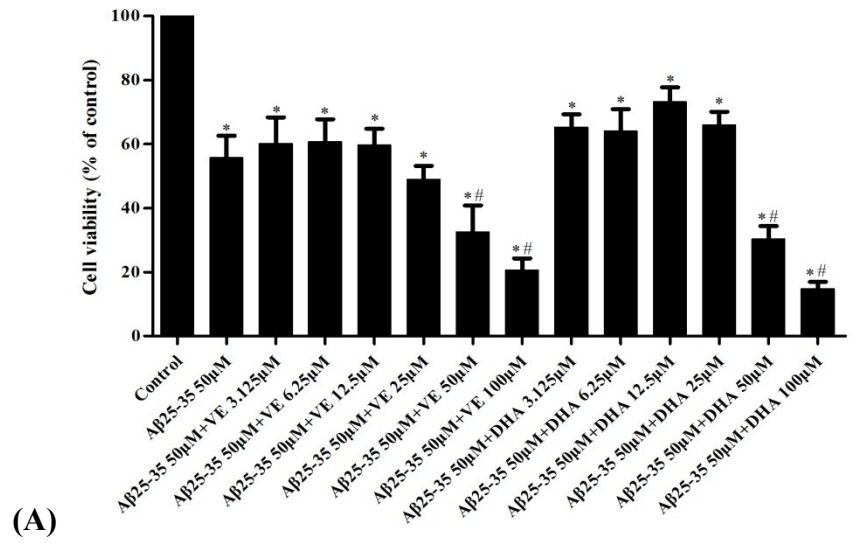

(A)

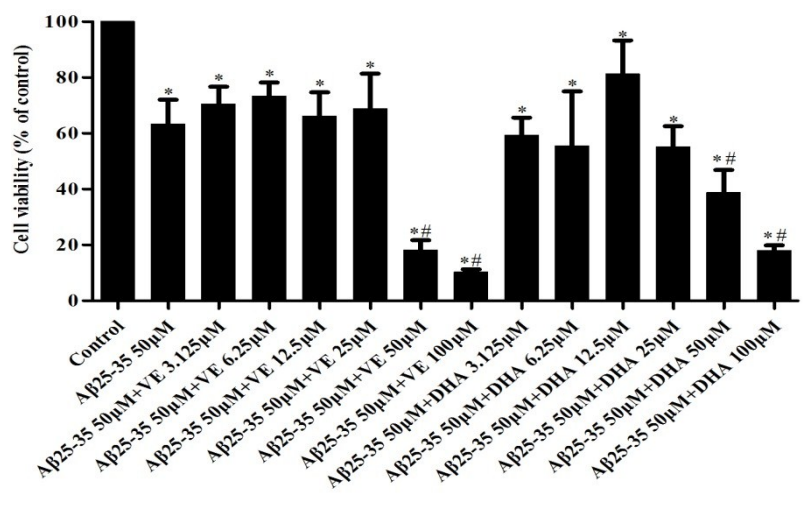

(B)

**Figure 2 Viability of PC12 cells pretreated with VE and DHA, (*n* = 6 for each group).** The cells were pretreated with VE (3.125 μM, 6.25 μM, 12.5 μM, 25 μM, 50 μM, 100 μM) and DHA (3.125 μM, 6.25 μM, 12.5 μM, 25 μM, 50 μM, 100 μM) for 4h, after that, 50 μM Aβ<sub>25-35</sub> was added into the culture medium for another 24 h (A) or 48 h (B) incubation. MTT assay was used for measuring cell viability. \*Comparing with control group, *P* < 0.05; #: comparing with Aβ<sub>25-35</sub> treatment group, *P* < 0.05.

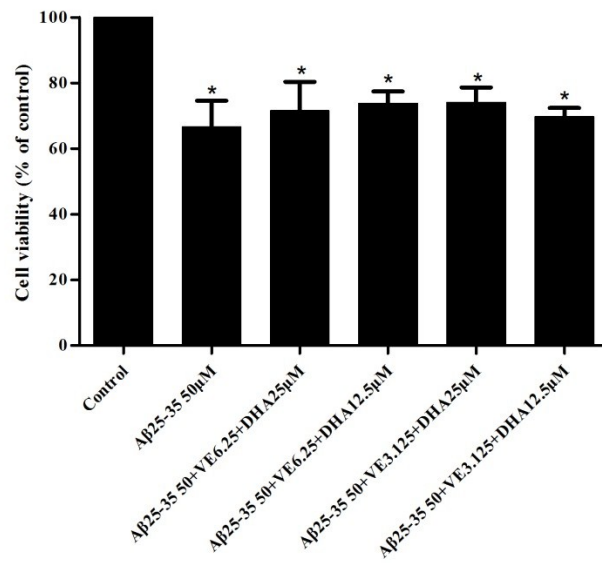

(A)

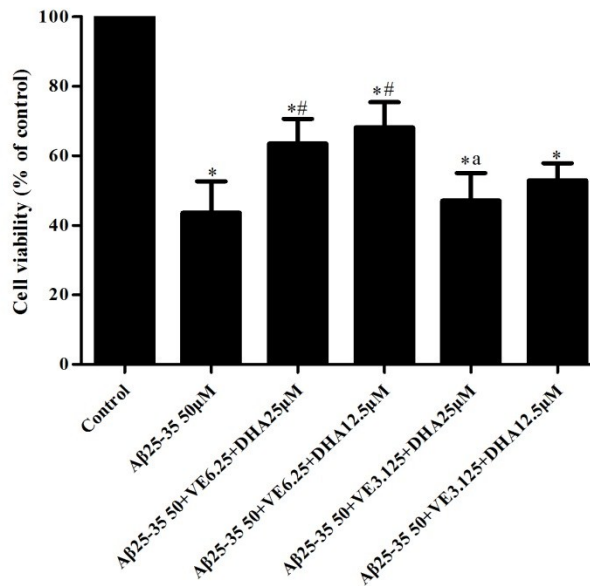

(B)

**Figure 3 Viability of PC12 cells pretreated with VE+DHA, ( $n = 6$  for each group).**

The cells were pretreated with VE+DHA (6.25  $\mu$ M VE +12.5 $\mu$ M DHA, 6.25  $\mu$ M VE + 25  $\mu$ M DHA, 3.125  $\mu$ M VE +12.5 $\mu$ M DHA, 3.125  $\mu$ M VE +25  $\mu$ M DHA) for 4h, after that, 50  $\mu$ M A $\beta_{25-35}$  was added into the culture medium for another 24 h (A) or 48 h (B) incubation. MTT assay was used for measuring cell viability. \*Comparing with control group,  $P < 0.05$ ; #: comparing with A $\beta_{25-35}$  treatment group,  $P < 0.05$ ; a: comparing with A $\beta_{25-35}$ +VE6.25+DHA 25 $\mu$ M group,  $P < 0.05$ .
